# Supplementary material for: Strategies for Reforestation under Uncertain Future Climates: Guidelines for Alberta, Canada
Source: PubMed Central journal article supplement (PMC3154268; doi:10.1371/journal.pone.0022977), 2011-08-10
Supplement: pone.0022977.s008.pdf [file pone.0022977.s008.pdf]

**Table S4.** Suitable habitat expressed as % area of seed zone for observed climate, and expressed as probability of habitat maintenance under climate change projections from 18 general circulation models.

| Jack Pine<br>seedzones* | Observed Climate |           | Projected Climate |       |       |
|-------------------------|------------------|-----------|-------------------|-------|-------|
|                         | 1961-1990        | 1997-2006 | 2020s             | 2050s | 2080s |
| CM 1.1                  | 99%              | 100%      | 89%               | 52%   | 31%   |
| CM 1.3                  | 94%              | 87%       | 71%               | 32%   | 15%   |
| CM 2.1                  | 100%             | 36%       | 69%               | 55%   | 22%   |
| CM 2.2                  | 100%             | 10%       | 84%               | 71%   | 33%   |
| CM 3.1                  | 97%              | 20%       | 72%               | 31%   | 14%   |
| CM 3.2                  | 96%              | 16%       | 73%               | 37%   | 16%   |
| CM 3.3                  | 88%              | 37%       | 67%               | 42%   | 21%   |
| DM 1.1                  | 89%              | 41%       | 38%               | 10%   | 3%    |
| LBH 1.5                 | 100%             | 54%       | 97%               | 70%   | 38%   |
| LF 1.1                  | 81%              | 41%       | 86%               | 73%   | 47%   |
| NM 1.1                  | 98%              | 91%       | 85%               | 69%   | 43%   |
| NM 2.1                  | 93%              | 42%       | 57%               | 74%   | 42%   |
| UBH 1.2                 | 78%              | 17%       | 23%               | 44%   | 34%   |
